1 **Suppression of Global Protein Translation in SARS-CoV-2 Infection**

2 Haripriya Parthasarathy<sup>\*,1</sup>, Divya Gupta<sup>\*,1</sup>, Abhirami P Suresh<sup>§,1</sup>, Dixit Tandel<sup>§,1,2</sup>, Vishal  
3 Sah<sup>1,2</sup>, and Krishnan Harinivas Harshan<sup>€,1</sup>

4 <sup>\*</sup>These authors contributed equally

5 <sup>§</sup>These authors contributed equally

6 <sup>1</sup>CSIR-Centre for Cellular and Molecular Biology, Hyderabad, India 500007

7 <sup>2</sup>Academy for Scientific and Innovative Research (AcSIR), Ghaziabad-201002, India

8

9 <sup>€</sup>Correspondence: [hkrishnan@ccmb.res.in](mailto:hkrishnan@ccmb.res.in)

10

11 **Keywords**

12 SARS-CoV-2, COVID-19, Global translation, mTORC1, Polysome profiling, 5'-TOP

13

14

15

16

17

## 18 **ABSTRACT**

19 The relationship of SARS-CoV-2 with the host translation remains largely unexplored. Using  
20 polysome profiling of SARS-CoV-2 infected Caco2 cells, we here demonstrate that the virus  
21 induces a strong suppression of global translation by 48 hours of infection. Heavy polysome  
22 fractions displayed substantial depletion in the infected cells, indicating the loss of major  
23 translational activities in them. Further assessment of the major pathways regulating translation  
24 in multiple permissive cell lines revealed strong eIF4E dephosphorylation accompanied by Mnk1  
25 depletion and ERK1/2 dephosphorylations. p38MAPK showed consistent activation and its  
26 inhibition lowered viral titers, indicating its importance in viral survival. mTORC1 pathway  
27 showed the most profound inhibition, indicating its potential contribution to the suppression of  
28 global translation associated with the infection. Pharmacological activation of mTORC1 caused  
29 a drop in viral titers while inhibition resulted in higher viral RNA levels, confirming a critical role  
30 of mTORC1 in regulating viral replication. Surprisingly, the infection did not cause a general  
31 suppression of 5'-TOP translation, as evident from the continued expression of ribosomal  
32 proteins. Our results collectively indicate that the differential suppression of mTORC1 might  
33 allow SARS-CoV-2 to hijack translational machinery in its favor and specifically target a set of  
34 host mRNAs.

## 35 **INTRODUCTION**

36 Severe acute respiratory syndrome- coronavirus 2 (SARS-CoV-2) is responsible for the  
37 current pandemic COVID-19 that has been wreaking havoc across the world, infecting  
38 millions and causing the death of over 3.22 million people over the past year (1). The  
39 newest member of the family *Coronaviridae* is a  $\beta$ -coronavirus with an approximately 30  
40 kb long RNA genome with positive polarity. The enveloped viral particles are  
41 approximately 120 nm in diameter. The Spike protein on the outer surface of the virions,

42 characteristic of coronaviruses, binds to angiotensin converting enzyme 2 (ACE2) found  
43 on the surfaces of several cells acting as the entry receptor for the virus (2). The virus  
44 enters through endocytosis and its genetic material is released into the cytosol after the  
45 endosome-lysosome fusion results in the unpacking of the virion.

46 After its release into the cytosol, SARS-CoV-2 RNA undergoes translation as in other  
47 positive stranded RNA viruses (3, 4). The preliminary rounds of translation synthesize  
48 long polypeptides pp1a and pp1ab from ORFs 1a and 1ab respectively. These  
49 polypeptides are later cleaved by proteases to generate about sixteen functional  
50 polypeptides which together form the replicase complex (5). In addition to these ORFs,  
51 SARS-CoV-2 codes for at least nine distinct sub-genomic mRNAs of variable lengths  
52 with common 3'-UTRs. Translation of these mRNAs is believed to be temporally  
53 regulated (6), possibly indicating its significance in the viral life-cycle.

54 Viruses establish a unique relationship with the host protein translation machinery. The  
55 general understanding is that viruses are total parasites on the host translation and  
56 hijack this machinery for translating their own protein. This often provides the virus an  
57 unhindered access to the machinery to keep synthesizing its proteins. However, various  
58 viruses have distinct requirements based on their nature of relationship with the hosts.  
59 Viruses such as poliovirus completely shut down host translation and use the machinery  
60 for its own translation using a cap-independent mechanism (7). Several other viruses  
61 inhibit host translation to varying degrees while allowing a set of mRNAs to translate (4,  
62 8). Yet, some other viruses such as hepatitis C virus (HCV) do not cause an apparent  
63 suppression of host translation, but still use a cap-independent mechanism for their  
64 translation. Members of Flaviviridae have a 5' capped genome but seem to be resistant

65 to the translational arrest imposed by them even though it affects host mRNAs (9).  
66 Coronaviruses are known to inhibit host protein translation (6, 10-13). Nsp1 is reported  
67 to interfere with host translation through its interaction with 40S ribosomes (6, 14-17).  
68 Reports also indicate that translation efficiency of viral mRNAs are not higher than the  
69 host mRNAs, but SARS-CoV-2 mediated preferential destruction of host mRNAs lead to  
70 their reduced translation events (6, 18). However, the molecular mechanisms remain  
71 much elusive.

72 Global translation activities in higher eukaryotes are regulated by three major pathways.  
73 mTORC1 pathway is the most studied of these and is known to regulate translation of a  
74 sub-set of mRNAs with a 5' terminal oligo pyrimidine (TOP) stretch (19-21). mTORC1 is  
75 active in metabolically active cells and promotes translation by facilitating the free  
76 availability of the cap-binding protein eIF4E (22). One of the substrates of mTORC1,  
77 eIF4E binding protein (4EBP), inhibits translation activities by sequestering eIF4E (23).  
78 mTORC1 mediated phosphorylation of 4EBP lowers its affinity towards eIF4E thereby  
79 making it available for cap-binding. mTORC1 also facilitates translation by  
80 phosphorylating ribosomal protein rpS6 (24), eIF4B and helicase eIF4A through  
81 p70S6K (25). Several viruses are reported to target mTORC1 in order to suppress host  
82 translation activities (13). Inhibition of mTORC1 is known to cause a major drop in  
83 active polysomes and translation activities (20, 21).

84 MAPKs p38 and ERK1/2 are known to regulate the phosphorylation of eIF4E through  
85 their substrate Mnk1/2 (26, 27). Even though Mnk mediated phosphorylation of eIF4E  
86 does not alter its affinity for the 5' cap of the mRNAs, phosphorylated eIF4E is  
87 commonly detected in several cancers leading several researchers to hypothesize that

88 this phosphorylation results in preferential translation of a set of mRNAs (28, 29). A third  
89 mechanism of regulation of global translation is the phosphorylation of eIF2 $\alpha$  at S52, a  
90 key event leading to reduced recycling rate of eIF2 ternary complexes that is critical for  
91 new events of translation initiations (30). Four kinases known as integrated stress  
92 response kinases coordinate this phosphorylation relaying various upstream signals.  
93 Protein kinase R (PKR), a dsRNA binding protein is one of these kinases that  
94 phosphorylates eIF2 $\alpha$  after the detection of dsRNA replication intermediates in the  
95 cytosol. This results in severe translational suppression in the virus infected cells as  
96 demonstrated in several cases (31, 32).

97 Coronavirus genome is 5' capped and polyadenylated indicating that they use the cap-  
98 dependent translation machinery. However, other coronaviruses were reported to inhibit  
99 host translation by various means (11). In this study, we investigated the relationship of  
100 SARS-CoV-2 with host translation machinery and regulatory networks. We demonstrate  
101 a severe dissociation of polysomes from 48 hours of infection that remained so during  
102 the rest of the course of infection. We did not find any evidence of eIF2 $\alpha$  participating in  
103 this translational decline. p38MAPK was phosphorylated throughout the course of the  
104 infection and its inhibition also resulted in lower viral titer. SARS-CoV-2 targeted Mnk1  
105 levels thereby limiting eIF4E phosphorylation. The strongest inhibition was visible in the  
106 mTORC1 pathway where its substrates 4EBP1 and ULK1 showed loss in levels and  
107 phosphorylation. Our studies demonstrate that SARS-CoV-2 infection causes severe  
108 arrest of host translation machinery most likely through strong mTORC1 inhibition  
109 without impacting its own protein synthesis and suggests that the viral mRNAs employ  
110 unique means to continue their translation under these conditions.

## 111 **RESULTS**

### 112 **Polysome profiles of SARS-CoV-2 infected cells demonstrate severe collapse of** 113 **polysomes**

114 We performed polysome profiling of Caco2 cells infected with SARS-CoV-2 (hCoV-  
115 19/India/TG-CCMB-O2-P1/2020) at multiple time intervals to map any changes in the  
116 global translation activity. The virus established infection by 24 hours post infection (hpi)  
117 as evident from the high levels of expression of the viral nucleocapsid (N) that continued  
118 until 96 hpi (Figure 1A). The expression of spike (S) peaked at 72 hpi and dropped  
119 thenceforth. Viral RNA replication increased until 72 hpi (Figure 1B). Interestingly, no  
120 major impact on polysome profiles was seen at 24 hpi while 48 hpi marked a  
121 remarkable collapse of polysomes with a modest swelling of the 80S peaks from 48 hpi  
122 (Figure 1 C-F). The heavy polysomes were particularly affected and this trend remained  
123 true until 96 hpi (Figure 1 C-F). Polysome profiling of cells infected with another strain of  
124 SARS-CoV-2 (hCoV-19/India/TG-CCMB-L1021/2020) induced an earlier collapse of the  
125 polysomes but confirmed the impact on the polysomes (Figure S1 A-D). Even though  
126 the polysomes underwent substantial dissociation, only a moderate swelling of the 80S  
127 was visible. This could be possibly due to the reported loss of host mRNAs by a  
128 selective degradation method initiated by Nsp1 of SARS-CoV-2 (16). At the same time,  
129 the translation of viral proteins continued unaffected (Figure 1A), confirming that the  
130 polysome dissociation is specifically targeting host mRNAs.

### 131 **SARS-CoV-2 infection does not cause eIF2 $\alpha$ phosphorylation during the** 132 **suppression of translation activities**

133 eIF2 $\alpha$  phosphorylation mediated inhibition of translation initiation is frequently observed  
134 in several viral infections including SARS-CoV. In addition to the activation of PKR by  
135 dsRNA, interferon has also been demonstrated to cause eIF2 $\alpha$  phosphorylation  
136 mediated translational arrest (33). We analyzed this modification in SARS-CoV-2  
137 infected Caco2 cells. A modest increase in eIF2 $\alpha$  phosphorylation observed at 24 and  
138 48 hpi in the infected cells disappeared soon while a prominent collapse of polysome  
139 was apparent (Figure 2). A similar observation was made in the infected Calu-3 cells as  
140 well (Figure S2A) despite a robust viral replication (Figure S2B) validating that SARS  
141 CoV-2 mediated translational arrest is not mediated through eIF2 $\alpha$  phosphorylation. On  
142 the other hand, the infected Huh7 cells (Figure S2C) exhibited a curious increase in  
143 eIF2 $\alpha$  phosphorylation throughout the course of infection, indicating a possible cell-type  
144 specific effect on the ISR pathway (Figure S2D). Since no eIF2 $\alpha$  phosphorylation was  
145 evident concurrent with the collapse of polysomes in Caco2, this molecule is unlikely to  
146 have contributed to the translational suppression.

#### 147 **ERK1/2-Mnk1/2-eIF4E is inhibited during SARS-CoV-2 infection**

148 eIF4E phosphorylation is often targeted under several physiological conditions and in  
149 certain viral infections (4, 8). We tested if SARS-CoV-2 targets this molecule in order to  
150 suppress host translation in Caco2 cells. Viral infection impacted the levels of several of  
151 the key molecules in this pathway beyond 48 hours of infection and hence we  
152 normalized the phosphorylation of these molecules and their abundance separately with  
153 the loading control. A moderate dephosphorylation of eIF4E at S209 residue was visible  
154 from 24 hours of infection (Figure 3).

155 Mnk1, the kinase that phosphorylates eIF4E, is regulated by two MAPKs, p38 and  
156 ERK1/2. Either of them has been demonstrated to activate Mnk1 through its  
157 phosphorylation. Mnk1 associated with eIF4G, the scaffold initiation factor of eIF4F  
158 complex, is activated upon phosphorylation and subsequently phosphorylates eIF4E. In  
159 agreement with the eIF4E dephosphorylation, Mnk1 also underwent dephosphorylation  
160 in SARS-CoV-2 infected cells (Figure 3), suggesting that the upstream MAPKs could be  
161 targeted by the viral infection. We subsequently analyzed the activation of the two  
162 MAPKs during SARS-CoV-2 infection in Caco2 cells. Consistent with the eIF4E and  
163 Mnk1 dephosphorylations, ERK1/2 dephosphorylation was evident in the infected cells  
164 from 24 hpi onwards, indicating that the upstream signals to ERK1/2 have been  
165 targeted during the infection (Figure 3). Major dephosphorylation of ERK1/2 and eIF4E  
166 was evident from 48 hpi in Huh7 cells as well (Figure S3). These results demonstrate  
167 that ERK1/2-Mnk-eIF4E pathway is targeted by SARS-CoV-2 infection at the  
168 abundance levels of the component molecules and additionally at their phosphorylation  
169 levels.

### 170 **p38MAPK phosphorylated during SARS-CoV-2 infection is beneficial to the viral** 171 **replication**

172 Unlike ERK1/2, p38MAPK was phosphorylated in SARS-CoV-2 infected cells  
173 throughout the duration. The phosphorylation increased with time, with the most intense  
174 phosphorylation detected at 96 hpi, suggesting that this MAPK might be very important  
175 for the viral activities (Figure 4A). We tested this hypothesis by inhibiting SARS-CoV-2  
176 infected Caco2 cells for 24 hours. The effect of inhibition of eIF4E phosphorylation was  
177 less remarkable in the infected cells as compared with the mock cultures similarly



178 inhibited, indicating the pressure from the viral replication. As we expected, inhibition of  
179 p38MAPK, confirmed by the dephosphorylation of eIF4E (Figure 4B), resulted in  
180 significantly lower intracellular viral RNA (Figure 4C) and infectious viral titer in the  
181 supernatant (Figure 4D) as compared against the untreated control culture. These  
182 results indicated that p38MAPK is activated in SARS-CoV-2 infected cells through  
183 specific upstream signals and this molecule plays important roles in SARS-CoV-2  
184 biology.

### 185 **SARS-CoV-2 inhibits mTORC1 and depletes its key substrates**

186 4EBP1 is a key substrate of mTORC1 through which the complex regulates translation  
187 initiation. Active mTORC1 phosphorylates T37/46 in 4EBP1, causing a reduction in its  
188 affinity for eIF4E. This phosphorylation triggers phosphorylations at additional sites and  
189 the hyperphosphorylated 4EBP1 migrates slowly as compared with the hypo- and partly  
190 phosphorylated molecules. We analyzed the kinetics of phosphorylation of 4EBP1  
191 during SARS-CoV-2 infection in Caco2 cells. As demonstrated in Figure 5A, 4EBP1  
192 phosphorylation was significantly reduced in SARS-CoV-2 infected cells from 48 hpi  
193 onwards. As in the case of ERK1/2-eIF4E pathway, 4EBP1 was also depleted in the  
194 infected cultures. Despite this depletion, the dephosphorylation was more intense,  
195 indicating that mTORC1 activity was inhibited. p70S6K1 and ULK1, two other major  
196 substrates of mTORC1 were also dephosphorylated in these samples, further  
197 confirming the loss of activity of the kinase complex. Interestingly, dephosphorylation  
198 was accompanied by a significant loss in the levels of all these proteins as well,  
199 suggesting that mTORC1 pathway components are also targeted for their availability in  
200 the infected cells. These results were consistent in Huh7 cells also, validating this

201 mechanism across cell types (Figure S4A). Recent reports have demonstrated a global  
202 decay of host mRNA possibly driven by Nsp1 during SARS-CoV-2 infection (6, 18). We  
203 investigated the association of the loss of 4EBP1 and ULK1 upon infection with a  
204 potential degradation of their transcripts using quantitative RT-PCR and surprisingly  
205 detected significantly elevated levels of their transcripts in the infected cells indicating  
206 the involvement of post-transcriptional regulations (Figure 5 B and C). Thus, these  
207 transcripts are not part of the host mRNAs specifically degraded by viral proteins. These  
208 results demonstrate that SARS-CoV-2 targets mTORC1 pathway by suppressing its  
209 activity as well by targeting the expression of the key molecules in the pathway. Active  
210 viral translation during severe inhibition of mTORC1 indicates that mTORC1 is  
211 dispensable for the translation of SARS CoV-2 proteins.

212 Since mTORC1 regulates translation of a large number of transcripts including those  
213 encoding ribosomal proteins through 5' TOP elements, we asked if the inhibition of  
214 mTORC1 pathway negatively impacts ribosomal biogenesis. Analysis of ribosomal  
215 proteins rpS3, rpL13a and rpL26 revealed that their expressions are not affected by  
216 SARS-CoV-2 infection (Figure 5D). Thus, despite a strong polysome dissociation and  
217 inhibition of mTORC1, ribosomal protein synthesis goes on unabated indicating that  
218 inhibition of mTORC1 activity is not affecting the translation of 5' TOP mRNAs. This part  
219 of the data suggests that SARS-CoV-2 brings about translational suppression through a  
220 remarkable inhibition of mTORC1 and the suppression could be selectively targeting a  
221 set of mRNAs.

222 **mTORC1 restricts SARS CoV-2 replication**

223 Since SARS CoV-2 infection caused strong suppression of mTORC1, we investigated  
224 whether this inhibition benefits the virus. Huh7 cells infected with SARS CoV-2 for 24  
225 hours were treated with 10  $\mu$ M MHY1485 to activate mTORC1. The drug failed to  
226 induce mTORC1 activity (4EBP1 phosphorylation) in the virus infected cells while its  
227 activation was detected in the mock-infected cells (Figure 6A), indicating that the virus  
228 infection overrides the activation of mTORC1 by the drug. Interestingly, activation of  
229 mTORC1 resulted in decreased intracellular RNA as well as infectious titer of the virus  
230 (Figure 6 B and C respectively). In agreement with this observation, a moderate drop in  
231 the nucleocapsid levels was also visible (Figure 6A). These observations suggest that  
232 lower mTORC1 activity is beneficial for SARS-CoV-2 replication.

233 Next, we inhibited mTORC1 by Torin1 and investigated its effect on the infection. After  
234 infecting the cells with SARS CoV-2 for 2 hours, they were treated with 750 nM Torin1  
235 until 24 hpi before analyzing the intracellular viral RNA. mTORC1 inhibition, confirmed  
236 by the dephosphorylation of 4EBP1 (Figure 6D), caused a two-fold increase in  
237 intracellular viral RNA levels (Figure 6E), strengthening the observations made in the  
238 preceding experiment that mTORC1 inhibition favors the viral replication. Our results  
239 indicate that mTORC1 inhibition might facilitate SARS-CoV-2 replication.

## 240 **DISCUSSION**

241 Several studies have indicated that SARS-CoV-2 infection suppresses host protein  
242 translation (2-4, 6, 12). While some have speculated this observation based on the  
243 reports from similar  $\beta$ -coronaviruses, others have implicated this based on the host  
244 mRNA degradation mediated by SARS-CoV-2 Nsp1 (6, 18). Nsp1 was also shown to  
245 associate with 40S ribosomes and block the entry of mRNAs (15). Our study provides a

246 detailed map of the impact of SARS-CoV-2 on global translation and the signal  
247 pathways that regulate the process. Polysome profile kinetics provided striking evidence  
248 of the suppression of host translation from around 48 hpi.

249 Even as other studies have reported global degradation of host mRNAs (6, 17), we  
250 have not come across any evidence that testifies this observation from our studies.

251 Widespread host mRNA degradation would have resulted in the accumulation of the  
252 short and free nucleotides in mRNP fractions that our studies have not observed.

253 Similar studies done in our laboratory using a flavivirus JEV show a significant swelling  
254 in 80S peaks concurrent with polysome dissociation as infection progressed, which  
255 wasn't as apparent in SARS-CoV-2 infected cells (data not shown). The fact that the  
256 80S peak did not undergo any shortening at the later time intervals suggested that a  
257 significant fraction of mRNAs are still associated with monosomes and could be  
258 translation-ready, as is evidenced by a sustained maintenance of lighter polysomes  
259 throughout the course of infection. Thus, a considerable proportion of the host mRNA  
260 population is likely to be intact despite being subject to specific degradation by viral  
261 factors. Justifying this claim, *4EBP1* and *ULK1* mRNAs were detected at significantly  
262 higher levels in the infected cells. This could have been a reflection of their  
263 transcriptional activation or enhanced stabilization of the transcripts, either of which  
264 indicates that they are not subject to degradation. Nsp1 mediated blocking of the host  
265 mRNAs from accessing 40S ribosomes might also have resulted in significant drop in  
266 the 80S assembly. However, a clear enlargement of 80S fraction was visible in cells  
267 expressing Nsp1 (17) indicating that the regulation is more complex. Interestingly, no  
268 such information is available for MERS in the literature. Further detailed studies are

269 necessary to understand the larger impact of SARS-CoV-2 infection on 80S and  
270 polysome assembly.

271 We have observed a systematic depletion of several host proteins during the course of  
272 viral infection, particularly at later stages. Majority of these included substrates of  
273 mTORC1 and members of MAPK pathway. Since 4EBP1 and ULK1 were not subject to  
274 mRNA degradation, it is very apparent that post-transcriptional and post-translational  
275 mechanisms targeting specific host proteins are quite pervasive in SARS-CoV-2  
276 infected cells.

277 mTORC1 was strongly inhibited by SARS-CoV-2. Targeting mTORC1 seems to be  
278 more concerted and with purpose since the substrates were also depleted at protein  
279 level. Justifying this point, conditions of lower mTORC1 activities promoted viral  
280 replication and its activation lowered the titers. It appears that post-transcriptional  
281 regulations play a role in their abundance in the infected cells. The implication of lower  
282 availability of 4EBP1 on the translation of host and viral mRNAs is unclear at this stage.  
283 Lower abundance of this inhibitory molecule could be interpreted to be facilitating eIF4F  
284 assembly and capped translation. However, the lower activity of mTORC1 also resulted  
285 in lower p70S6K phosphorylation indicating that the net impact of its inhibition results in  
286 reduced polysome assembly and translation activities. Interestingly, ribosomal proteins  
287 that we tested remained abundantly available in the infected cells and this might be  
288 important for the translation of viral proteins. Thus, it appears that mTORC1 inhibition  
289 does not target all 5'TOP mRNAs but must be targeting a select set of mRNAs without  
290 compromising the requirements of the virus.

291 How mTORC1 inhibition is brought about by SARS-CoV-2 is unclear. A recent study  
292 (34) reported that SARS-CoV-2 rewires metabolic pathways in the infected cells that  
293 results in enhanced mTORC1 activity. However, this study was limited to 24 hpi which is  
294 quite early in the context of an ongoing infection. Our study also indicated an early,  
295 albeit modest, activation of mTORC1. However, the inhibition accompanied by the loss  
296 of substrates at later time points was very consistent and strong in more than one cell  
297 line. In the context of altering metabolic activities during infection, it appears that the  
298 metabolic networks are manipulated differently during the distinct phase of infection and  
299 this may have a significant bearing on the outcome of infection.

300 eIF4E phosphorylation is dependent on the activities of ERK1/2 and p38MAPK. It is  
301 curious to note that only ERK1/2, but not p38MAPK, was dephosphorylated by SARS-  
302 CoV-2 mediated signaling activities. Unpublished results from our laboratory have  
303 indicated synergistic regulation of Mnk1 by these MAPKs. Curiously, Mnk1 was also  
304 targeted at the protein level by the virus and this must have significantly impacted eIF4E  
305 phosphorylation. Since eIF4E phosphorylation is understood to affect only a select set  
306 of mRNAs translationally (35), we believe that its contribution to the global suppression  
307 of translation activities caused by SARS-CoV-2 infection could be limited and more  
308 studies are necessary to determine its impact. The consequence of p38MAPK  
309 phosphorylation and possible activation of this molecule in SARS-CoV-2 infection is  
310 very evident from the inhibition studies. The drop in viral titer was modest, but  
311 proportionate to the magnitude of inhibition. Whether this has any impact on the  
312 translation of viral proteins is to be determined.

313 It is intriguing why SARS-CoV-2 infection does not induce eIF2 $\alpha$  phosphorylation. eIF2 $\alpha$   
314 is phosphorylated by one of its four kinases most of which are activated upon various  
315 stress exerted on the cell. RNA viruses often impart intense stress on ER that is relayed  
316 to PERK (36, 37). PKR, one of the dsRNA sensors is often activated by RNA viral  
317 infections. These observations indicate that SARS-CoV-2 depends on the canonical  
318 mechanism of translation initiation that requires the availability of active ternary  
319 complexes, which eIF2 $\alpha$  is a part of. Since eIF2 $\alpha$  phosphorylation results in the  
320 inhibition of new initiation events that would adversely affect the translation of viral  
321 transcripts as well, SARS-CoV-2 might have evolved strategies to bypass this  
322 modification.

## 323 **Materials and Methods**

### 324 **Antibodies and inhibitors**

325 All primary antibodies were purchased from Cell Signaling Technologies except the anti-  
326 SARS Spike antibody (Novus Biologicals; NB100-56578) and anti-SARS-CoV-2  
327 Nucleocapsid (Thermo Fisher; MA5-29982). HRP-conjugated anti-rabbit and anti-mouse  
328 secondary antibodies were purchased from Jackson ImmunoResearch. Torin1 and  
329 MHY1485 were from Sigma, whereas the p38 VIII inhibitor was from Cayman  
330 Chemicals.

### 331 **Cell culture**

332 Vero (CCL-81) African green monkey kidney epithelial cells, Huh7 human hepatoma  
333 cells and Calu3 lung adenocarcinoma cells were cultured in Dulbecco's Modified

334 Eagle's Medium (DMEM; from Gibco) with 10% Fetal Bovine Serum (FBS; Hyclone) and  
335 1× penicillin-streptomycin cocktail (Gibco) at 37°C and 5% CO<sub>2</sub>. Colorectal  
336 adenocarcinoma Caco2 cells, were grown in DMEM supplemented with 20% FBS and  
337 1× antibiotic. Cells were continuously passaged at 70-80% confluency and mycoplasma  
338 contamination was monitored periodically.

### 339 **SARS-CoV-2 Infection and quantification**

340 Two Indian isolates of SARS-CoV-2 strains were used in this study (GSSAID id:  
341 EPI\_ISL\_458075 and EPI\_ISL\_458046) (38, 39). All the viral cultures were propagated  
342 in Vero (CCL-81) cells in serum and antibiotics free conditions. Caco2, Huh7 or Calu-3  
343 cells were infected at 1 MOI for 2 hours in serum-free conditions after which the media  
344 was replaced with complete media and further incubated until the time of harvesting. At  
345 the time of harvesting, the cells were first trypsinized and collected separately for  
346 protein and RNA study. The intracellular and extracellular RNA from cells was isolated  
347 using respective kits (MACHEREY-NAGEL GmbH & Co. KG) and the SARS-CoV-2  
348 RNA was quantified using a commercial kit (LabGun™ COVID-19 RT-PCR Kit)  
349 following manufacturers protocol in Roche LightCycler 480. For intracellular SARS-  
350 CoV-2 RNA, the normalization was performed against GAPDH after preparing cDNA in  
351 two-step reactions (Primescript, Takara Bio). The infectious viral particle numbers in the  
352 supernatant were quantified using plaque-forming unit (PFU/mL) assay. Briefly, the  
353 supernatant was log diluted ( $10^{-1}$ - $10^{-7}$ ) in 1× serum-free DMEM and used for infecting  
354 Vero monolayer grown in six- or twelve-well plates. 2 hpi, the cells briefly washed and  
355 were overlaid with agarose: DMEM mix (in 1:1 ratio; 2 x DMEM with 5% FBS and 1%  
356 penicillin-streptomycin mixed with equal volumes of 2% LMA), after which the plates



357 were incubated undisturbed for 6 days at 37°C. Later, the cells were fixed with 4%  
358 formaldehyde and stained with crystal violet. The clear zones were counted and PFU  
359 was calculated as PFU/mL.

### 360 **Inhibitions and infection**

361 Torin1 inhibition and MHY1485 activation were done in Huh7 cells. For the Torin1  
362 inhibition experiment,  $0.45 \times 10^6$  cells were seeded in a six-well format and 24 hours  
363 later the cells were infected with SARS-CoV-2, at 1 MOI for 2 hours in serum-free  
364 media. Later, the infection media was replaced with serum sufficient media containing  
365 750 nM Torin1 or DMSO, and incubated for 22 hrs. At the end of the treatment, the cells  
366 were harvested and protein and RNA were prepared. For the activation of mTORC1,  
367 cells were treated with MHY1485 at 24 hpi at 10  $\mu$ M concentration and harvested at 48  
368 hpi. The p38 inhibition was carried out in Caco2 cells similar to the MHY1485  
369 experiment. The intracellular and extracellular RNA were subjected to qRT-PCR, and  
370 the protein lysates were subjected to western blotting for confirmation of inhibition or  
371 activation.

### 372 **Polysome preparation**

373 Polysomes were fractionated as explained elsewhere (40). Caco2 cells were grown in  
374 175cm<sup>2</sup> flasks till 70% confluency and subsequently infected with SARS-CoV-2 at 1  
375 MOI. Media was changed after 2 hours, and cells were harvested at 24, 48 72, and 96  
376 hpi, along with mock-infected cells grown alongside for each time point.

377 The cells were incubated for 5-10 minutes, harvested and washed twice with a solution  
378 of ice-cold 1xPBS containing 100  $\mu$ g/mL cycloheximide, to freeze the polysomes on the

379 mRNAs. They were subsequently lysed in polysome lysis buffer containing 20 mM Tris-  
380 Cl pH 8.0, 140 mM KCl, 1.5 mM MgCl<sub>2</sub>, 0.5 mM DTT, 1% Triton X-100, 1× protease  
381 inhibitor, 0.5 mg/L heparin, 100 µg/mL cycloheximide, and RNase inhibitor. Crude RNA  
382 was quantified using a spectrophotometer, and 90 µg was layered onto 11 mL of 10-  
383 50% linear sucrose gradient (20 mM Tris-Cl pH 8.0, 140 mM KCl, 1.5 mM MgCl<sub>2</sub>, 0.5  
384 mM DTT, 100 µg/mL cycloheximide, 1mM PMSF, 10-50% sucrose). The resulting  
385 gradients were centrifuged in an SW41 Ti rotor (Beckman Coulter) at 35,000 r.p.m. at  
386 4°C for 3.5 hours. The polysome samples were fractionated using Teledyne ISCO  
387 fraction collector system and absorbance measured and graphically noted at 254 nM.  
388 Polysome profiles of mock and infected cells for each time point were digitized and  
389 overlaid on Inkscape.

### 390 **Immunoblotting**

391 Protein pellets were lysed in 1 × Nonidet P-40 lysis buffer (1% Nonidet P-40, 50  
392 mM Tris HCl, 150 mM NaCl (pH 7.5), EGTA, 1 mM sodium orthovanadate, 10  
393 mM sodium pyrophosphate, 100 mM NaF, and 1 mM PMSF) incubated on ice for 20  
394 minutes with intermittent vortexing and centrifuged at 13000 rpm for 15 minutes at 4°C.  
395 The supernatants containing the proteins were collected and quantified using BCA  
396 reagents (G Biosciences). Lysates were mixed with 6× denaturing dye and the proteins  
397 were resolved using SDS-PAGE and transferred to PVDF membranes. The membranes  
398 were blocked in 5% BSA dissolved in 1× TBST before the addition of primary  
399 antibodies. Primary antibodies against the proteins of interest were diluted in the  
400 blocking buffer, added to the membrane and incubated overnight at 4°C. Later, the  
401 membranes were washed in 1× TBST, secondary antibodies conjugated with HRP were

402 added and the blots were developed on a Bio-Rad Chemidoc MP system using  
403 SuperSignal West Pico PLUS (Thermo Fisher) and SuperSignal West Femto Maximum  
404 Sensitivity (Thermo Fisher) chemiluminescent substrate kits.

#### 405 **Statistical analysis**

406 For each experiment, at least three independent replicates were used to calculate mean  
407  $\pm$  SEM, and plotted graphically wherever indicated. Statistical significance was  
408 measured using two-tailed, unpaired Student *t*-test and the resultant *p* values were  
409 represented as \*, \*\*, \*\*\* indicating *p* values  $\leq$  0.05, 0.005, and 0.0005, respectively.

#### 410 **Institutional biosafety**

411 Institutional biosafety clearance was obtained by K.H.H., for the experiments pertaining to  
412 SARS-CoV-2.

#### 413 **Acknowledgements**

414 We thank Mohan Singh Moodu and Amit Kumar for assisting with logistics and Karthika  
415 S Nair for her assistance with some experiments

416

417

#### 418 **Funding**

419 This study was supported by internal funding from Council of Scientific and Industrial  
420 Research (CSIR), Govt. of India. D.G., and D.K received research fellowship from

421 CSIR. V.S received research fellowship from the Department of Biotechnology (DBT),  
422 Govt. of India.

## 423 **Contributions**

424 The experiments were conceived by H.P., D.G., and K.H.H. H.P., and D.G., performed  
425 polysome profiling. D.G., D.K., and V.S prepared SARS-CoV-2, performed infections,  
426 quantified them and analyzed data. H.P., A.P.S., and D.K performed immunoblotting.  
427 H.P., and D.G., assisted K.H.H in writing the manuscript.

## 428 **References**

- 429 1. Zhou P, Yang XL, Wang XG, Hu B, Zhang L, Zhang W, Si HR, Zhu Y, Li B, Huang CL, Chen HD, Chen  
430 J, Luo Y, Guo H, Jiang RD, Liu MQ, Chen Y, Shen XR, Wang X, Zheng XS, Zhao K, Chen QJ, Deng F,  
431 Liu LL, Yan B, Zhan FX, Wang YY, Xiao GF, Shi ZL. 2020. A pneumonia outbreak associated with a  
432 new coronavirus of probable bat origin. *Nature* 579:270-273.
- 433 2. Shang J, Wan Y, Luo C, Ye G, Geng Q, Auerbach A, Li F. 2020. Cell entry mechanisms of SARS-  
434 CoV-2. *Proceedings of the National Academy of Sciences* 117:11727-11734.
- 435 3. V'kovski P, Kratzel A, Steiner S, Stalder H, Thiel V. 2021. Coronavirus biology and replication:  
436 implications for SARS-CoV-2. *Nature Reviews Microbiology* 19:155-170.
- 437 4. Walsh D, Mohr I. 2011. Viral subversion of the host protein synthesis machinery. *Nature Reviews*  
438 *Microbiology* 9:860-875.
- 439 5. Finkel Y, Mizrahi O, Nachshon A, Weingarten-Gabbay S, Morgenstern D, Yahalom-Ronen Y,  
440 Tamir H, Achdout H, Stein D, Israeli O, Beth-Din A, Melamed S, Weiss S, Israely T, Paran N,  
441 Schwartz M, Stern-Ginossar N. 2021. The coding capacity of SARS-CoV-2. *Nature* 589:125-130.
- 442 6. Finkel Y, Gluck A, Winkler R, Nachshon A, Mizrahi O, Lubelsky Y, Zuckerman B, Slobodin B,  
443 Yahalom-Ronen Y, Tamir H, Ulitsky I, Israely T, Paran N, Schwartz M, Stern-Ginossar N. 2020.  
444 SARS-CoV-2 utilizes a multipronged strategy to suppress host protein synthesis  
445 doi:10.1101/2020.11.25.398578. *bioRxiv*.
- 446 7. Etchison D, Milburn SC, Ederly I, Sonenberg N, Hershey JW. 1982. Inhibition of HeLa cell protein  
447 synthesis following poliovirus infection correlates with the proteolysis of a 220,000-dalton  
448 polypeptide associated with eucaryotic initiation factor 3 and a cap binding protein complex. *J*  
449 *Biol Chem* 257:14806-10.
- 450 8. Jan E, Mohr I, Walsh D. 2016. A Cap-to-Tail Guide to mRNA Translation Strategies in Virus-  
451 Infected Cells. *Annu Rev Virol* 3:283-307.
- 452 9. Edgil D, Polacek C, Harris E. 2006. Dengue Virus Utilizes a Novel Strategy for Translation  
453 Initiation When Cap-Dependent Translation Is Inhibited. *Journal of Virology* 80:2976-2986.
- 454 10. Kamitani W, Huang C, Narayanan K, Lokugamage KG, Makino S. 2009. A two-pronged strategy to  
455 suppress host protein synthesis by SARS coronavirus Nsp1 protein. *Nature Structural &*  
456 *Molecular Biology* 16:1134-1140.

- 457 11. Nakagawa K, Lokugamage KG, Makino S. 2016. Viral and Cellular mRNA Translation in  
458 Coronavirus-Infected Cells. *Adv Virus Res* 96:165-192.
- 459 12. Banerjee AK, Blanco MR, Bruce EA, Honson DD, Chen LM, Chow A, Bhat P, Ollikainen N,  
460 Quinodoz SA, Loney C, Thai J, Miller ZD, Lin AE, Schmidt MM, Stewart DG, Goldfarb D, De  
461 Lorenzo G, Rihn SJ, Voorhees RM, Botten JW, Majumdar D, Guttman M. 2020. SARS-CoV-2  
462 Disrupts Splicing, Translation, and Protein Trafficking to Suppress Host Defenses. *Cell* 183:1325-  
463 1339.e21.
- 464 13. Stern-Ginossar N, Thompson SR, Mathews MB, Mohr I. 2019. Translational Control in Virus-  
465 Infected Cells. *Cold Spring Harb Perspect Biol* 11.
- 466 14. Lapointe CP, Grosely R, Johnson AG, Wang J, Fernández IS, Puglisi JD. 2021. Dynamic  
467 competition between SARS-CoV-2 NSP1 and mRNA on the human ribosome inhibits translation  
468 initiation. *Proc Natl Acad Sci U S A* 118.
- 469 15. Schubert K, Karousis ED, Jomaa A, Scaiola A, Echeverria B, Gurzeler LA, Leibundgut M, Thiel V,  
470 Mühlemann O, Ban N. 2020. SARS-CoV-2 Nsp1 binds the ribosomal mRNA channel to inhibit  
471 translation. *Nat Struct Mol Biol* 27:959-966.
- 472 16. Shi M, Wang L, Fontana P, Vora S, Zhang Y, Fu TM, Lieberman J, Wu H. 2020. SARS-CoV-2 Nsp1  
473 suppresses host but not viral translation through a bipartite mechanism. *bioRxiv*  
474 doi:10.1101/2020.09.18.302901.
- 475 17. Thoms M, Buschauer R, Ameismeier M, Koepke L, Denk T, Hirschenberger M, Kratzat H, Hayn M,  
476 Mackens-Kiani T, Cheng J, Straub JH, Stürzel CM, Fröhlich T, Berninghausen O, Becker T,  
477 Kirchhoff F, Sparrer KMJ, Beckmann R. 2020. Structural basis for translational shutdown and  
478 immune evasion by the Nsp1 protein of SARS-CoV-2. *Science* 369:1249-1255.
- 479 18. Puray-Chavez M, Tenneti K, Vuong HR, Lee N, Liu Y, Horani A, Huang T, Case JB, Yang W,  
480 Diamond MS, Brody SL, Dougherty J, Kutluay SB. 2020. The translational landscape of SARS-CoV-  
481 2 and infected cells. *bioRxiv* doi:10.1101/2020.11.03.367516.
- 482 19. Jefferies HB, Reinhard C, Kozma SC, Thomas G. 1994. Rapamycin selectively represses  
483 translation of the "polypyrimidine tract" mRNA family. *Proc Natl Acad Sci U S A* 91:4441-5.
- 484 20. Thoreen CC, Chantranupong L, Keys HR, Wang T, Gray NS, Sabatini DM. 2012. A unifying model  
485 for mTORC1-mediated regulation of mRNA translation. *Nature* 485:109-113.
- 486 21. Hsieh AC, Liu Y, Edlind MP, Ingolia NT, Janes MR, Sher A, Shi EY, Stumpf CR, Christensen C,  
487 Bonham MJ, Wang S, Ren P, Martin M, Jessen K, Feldman ME, Weissman JS, Shokat KM, Rommel  
488 C, Ruggiero D. 2012. The translational landscape of mTOR signalling steers cancer initiation and  
489 metastasis. *Nature* 485:55-61.
- 490 22. Hay N, Sonenberg N. 2004. Upstream and downstream of mTOR. *Genes Dev* 18:1926-45.
- 491 23. Ma XM, Blenis J. 2009. Molecular mechanisms of mTOR-mediated translational control. *Nature*  
492 *Reviews Molecular Cell Biology* 10:307-318.
- 493 24. Hara K, Yonezawa K, Weng Q-P, Kozlowski MT, Belham C, Avruch J. 1998. Amino Acid Sufficiency  
494 and mTOR Regulate p70 S6 Kinase and eIF-4E BP1 through a Common Effector Mechanism\*.  
495 *Journal of Biological Chemistry* 273:14484-14494.
- 496 25. Zoncu R, Efeyan A, Sabatini DM. 2011. mTOR: from growth signal integration to cancer, diabetes  
497 and ageing. *Nature Reviews Molecular Cell Biology* 12:21-35.
- 498 26. Pyronnet S, Imataka H, Gingras AC, Fukunaga R, Hunter T, Sonenberg N. 1999. Human eukaryotic  
499 translation initiation factor 4G (eIF4G) recruits mnk1 to phosphorylate eIF4E. *Embo j* 18:270-9.
- 500 27. Joshi B, Cai AL, Keiper BD, Minich WB, Mendez R, Beach CM, Stepinski J, Stolarski R,  
501 Darzynkiewicz E, Rhoads RE. 1995. Phosphorylation of eukaryotic protein synthesis initiation  
502 factor 4E at Ser-209. *J Biol Chem* 270:14597-603.
- 503 28. Schepers GC, Proud CG. 2002. Does phosphorylation of the cap-binding protein eIF4E play a role  
504 in translation initiation? *Eur J Biochem* 269:5350-9.

- 505 29. Lazaris-Karatzas A, Montine KS, Sonenberg N. 1990. Malignant transformation by a eukaryotic  
506 initiation factor subunit that binds to mRNA 5' cap. *Nature* 345:544-7.
- 507 30. Krishnamoorthy T, Pavitt GD, Zhang F, Dever TE, Hinnebusch AG. 2001. Tight binding of the  
508 phosphorylated alpha subunit of initiation factor 2 (eIF2alpha) to the regulatory subunits of  
509 guanine nucleotide exchange factor eIF2B is required for inhibition of translation initiation. *Mol*  
510 *Cell Biol* 21:5018-30.
- 511 31. Rojas M, Arias CF, López S. 2010. Protein kinase R is responsible for the phosphorylation of  
512 eIF2alpha in rotavirus infection. *J Virol* 84:10457-66.
- 513 32. Bechill J, Chen Z, Brewer JW, Baker SC. 2008. Coronavirus infection modulates the unfolded  
514 protein response and mediates sustained translational repression. *J Virol* 82:4492-501.
- 515 33. Pham AM, Santa Maria FG, Lahiri T, Friedman E, Marie IJ, Levy DE. 2016. PKR Transduces MDA5-  
516 Dependent Signals for Type I IFN Induction. *PLoS Pathog* 12:e1005489.
- 517 34. Mullen PJ, Garcia G, Purkayastha A, Matulionis N, Schmid EW, Momcilovic M, Sen C, Langerman  
518 J, Ramaiah A, Shackelford DB, Damoiseaux R, French SW, Plath K, Gomperts BN, Arumugaswami  
519 V, Christofk HR. 2021. SARS-CoV-2 infection rewires host cell metabolism and is potentially  
520 susceptible to mTORC1 inhibition. *Nature Communications* 12:1876.
- 521 35. Furic L, Rong L, Larsson O, Koumakpayi IH, Yoshida K, Brueschke A, Petroulakis E, Robichaud N,  
522 Pollak M, Gaboury LA, Pandolfi PP, Saad F, Sonenberg N. 2010. eIF4E phosphorylation promotes  
523 tumorigenesis and is associated with prostate cancer progression. *Proceedings of the National*  
524 *Academy of Sciences* 107:14134-14139.
- 525 36. Pavio N, Romano PR, Graczyk TM, Feinstone SM, Taylor DR. 2003. Protein synthesis and  
526 endoplasmic reticulum stress can be modulated by the hepatitis C virus envelope protein E2  
527 through the eukaryotic initiation factor 2alpha kinase PERK. *J Virol* 77:3578-85.
- 528 37. Su HL, Liao CL, Lin YL. 2002. Japanese encephalitis virus infection initiates endoplasmic reticulum  
529 stress and an unfolded protein response. *J Virol* 76:4162-71.
- 530 38. Gupta D, Parthasarathy H, Sah V, Tandel D, Vedagiri D, Reddy S, Harshan KH. 2021. Inactivation  
531 of SARS-CoV-2 by  $\beta$ -propiolactone Causes Aggregation of Viral Particles and Loss of Antigenic  
532 Potential. *bioRxiv* doi:10.1101/2021.04.22.441045:2021.04.22.441045.
- 533 39. Gupta D, Ahmed F, Tandel D, Parthasarathy H, Vedagiri D, Sah V, Krishna Mohan B, Daga S, Khan  
534 RA, Kondiparthi C, Savari P, Jain S, Daga J, Reddy S, Khan N, Harshan KH. 2021. Development of  
535 Equine Immunoglobulin Fragment F(ab')<sub>2</sub> with High Neutralizing Capability against SARS-CoV-2.  
536 *bioRxiv* doi:10.1101/2021.03.09.434030:2021.03.09.434030.
- 537 40. George A, Panda S, Kudmulwar D, Chhatbar SP, Nayak SC, Krishnan HH. 2012. Hepatitis C virus  
538 NS5A binds to the mRNA cap-binding eukaryotic translation initiation 4F (eIF4F) complex and up-  
539 regulates host translation initiation machinery through eIF4E-binding protein 1 inactivation. *J*  
540 *Biol Chem* 287:5042-58.

541

542

543

544

545 **Figure 1**

546

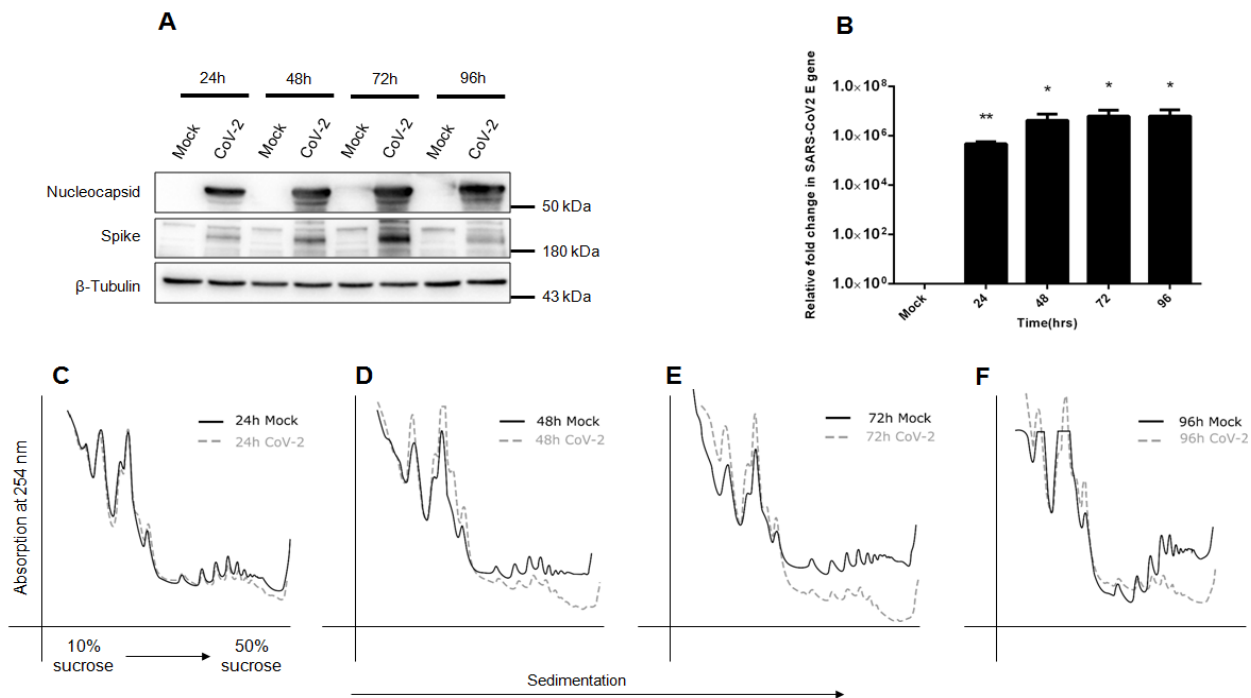

547

548

549 **Figure 1. Polysome profiles of SARS-CoV-2 infected cells demonstrate severe**  
550 **collapse of polysomes.** (A) Immunoblot analysis of mock and SARS-CoV-2 infected  
551 Caco2 cells over 24, 48, 72, and 96 hours of infection with SARS-CoV-2. Cell lysates  
552 were electrophoresed by SDS-PAGE and probed for viral proteins, Nucleocapsid and  
553 Spike. (B) Relative fold change in SARS-CoV-2 E gene, quantified through qRT-PCR,  
554 across the four time points. Graph represents data from 3 sets and is plotted as mean  $\pm$   
555 SEM. *p*-values were calculated using Student's *t*-test and represented as \* and \*\*,  
556 indicating *p*-values  $\leq$  0.05 and 0.005, respectively. (C-F) Polysome profiles of Caco2  
557 cells infected with SARS-CoV-2 for 24-, 48-, 72- and 96 hours. The cells were treated  
558 with 100  $\mu$ g/mL CHX before harvesting and lysed in polysome lysis buffer. Equal  
559 quantities of lysates were layered onto continuous sucrose gradients ranging from 10-  
560 50%, subjected to ultracentrifugation, and fractionated along with measuring  
561 absorbance at 254 nm. The digitized profiles for infected and uninfected samples for  
562 each time point were overlaid to assess any change in global translation levels.

563

564 **Figure 2**

565

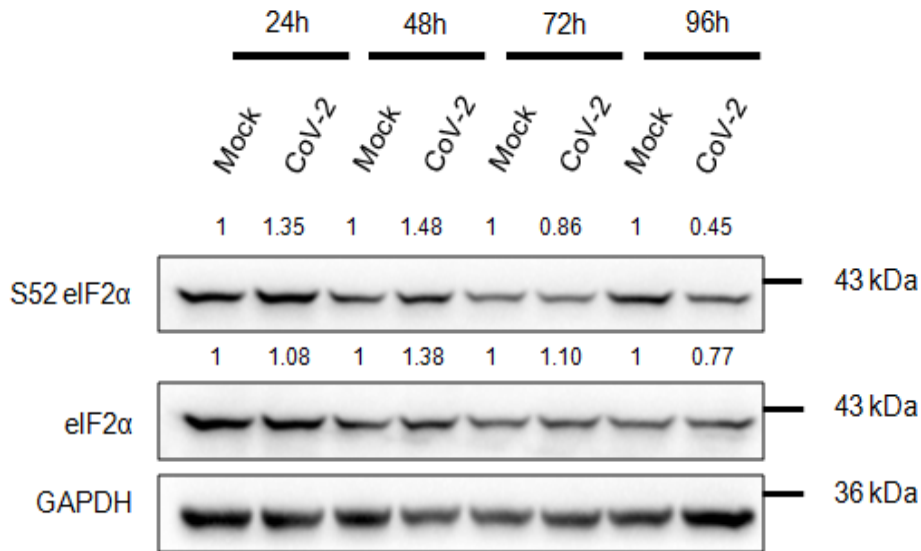

566

567

568 **Figure 2. The suppression of translation activities in SARS-CoV-2 infection does**  
569 **not involve eIF2α phosphorylation.** Immunoblot analysis of mock and SARS-CoV-2  
570 infected Caco2 cells assessing kinetics of phosphorylation of eIF2α at S52 and its  
571 expression, each normalized against GAPDH. Intensities of phosphorylated and total  
572 proteins were separately normalized against GAPDH and the values are represented  
573 above the corresponding panel. The phosphorylated residues are marked against the  
574 respective panel.

575

576

577

578

579

580

581

582

583

584



585 **Figure 3**

586

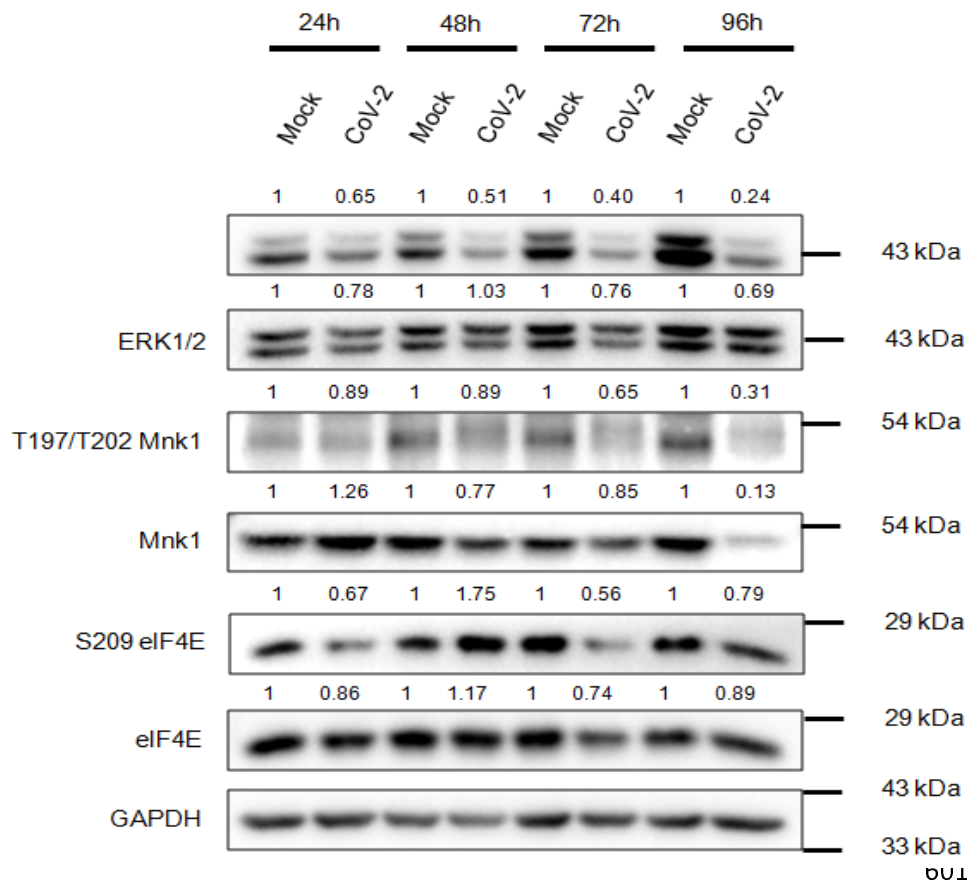

602 **Figure 3. ERK1/2-Mnk1-eIF4E axis is inhibited during SARS-CoV-2 infection.**  
603 Representative immunoblot showing phosphorylation kinetics of ERK1/2, Mnk1 and  
604 eIF4E in Caco2 cells, normalised against GAPDH, of the panel displayed. Intensities of  
605 phosphorylated and total proteins were separately normalized against GAPDH and the  
606 values are represented above the corresponding panel. The phosphorylated residues  
607 are marked against the respective panel.

608

609 **Figure 4**

610

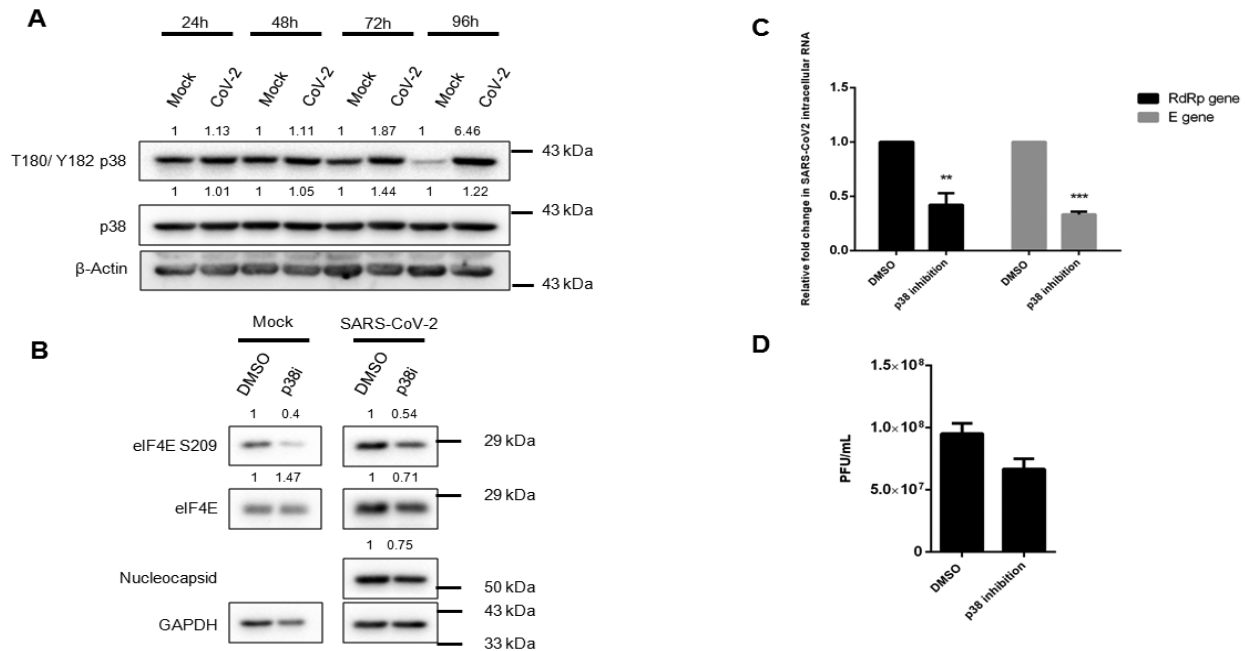

611

612

613 **Figure 4. Phosphorylated p38MAPK during SARS-CoV-2 infection is beneficial to**  
614 **the viral replication.** (A) Immunoblots showing phosphorylation status of p38 at  
615 T180/Y182 position along the course of SARS-CoV-2 infection at 24-, 48-, 72-, and 96  
616 hours in Caco2 cells, along with densitometry data of phosphorylation and expression.  
617 As in the previous sections, densitometric intensities of phosphorylated and the total  
618 proteins were separately normalized against the loading control. (B) SARS-CoV-2  
619 infected cells were treated with p38 VIII inhibitor (p38i) at 10 μM concentration for 24  
620 hours beginning at 24 hpi until harvesting. The inhibition was scored by  
621 dephosphorylation status of eIF4E and viral protein abundance under p38 inhibited  
622 environment was also studied. (C) Relative fold change in SARS-CoV-2 intracellular  
623 RdRp and E gene RNA, in DMSO and p38-inhibited cells. (D) Infectious virion measure  
624 in DMSO and p38-inhibited supernatants, quantified as PFU/mL. Graphs represent data  
625 from at least three sets and are plotted as mean ± SEM. *p*-values are represented as \*\*  
626 and \*\*\*, indicating *p*-values ≤ 0.005 and 0.0005, respectively.

627

628

629

630

631 **Figure 5**

632

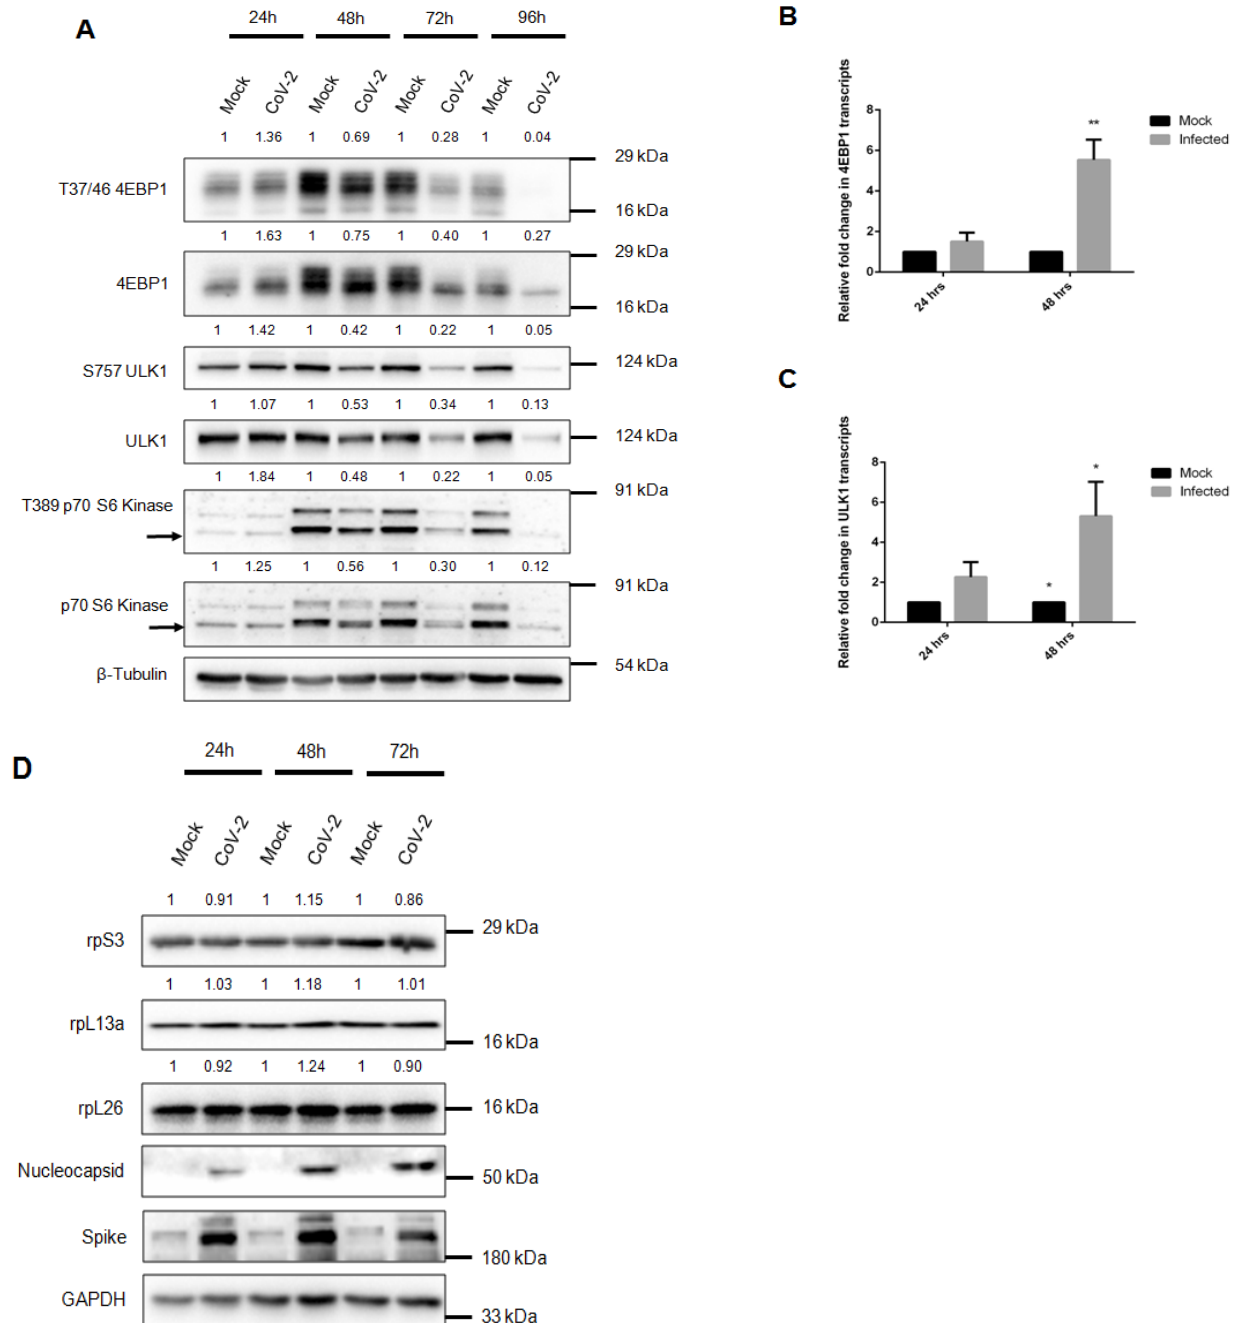

633

644

645 **Figure 5. SARS-CoV-2 inhibits mTORC1 and depletes its key substrates.** (A)  
 646 Immunoblots representing status of mTORC1 kinase activity in mock and infected  
 647 Caco2 cells through its different substrates- 4EBP1, ULK1, and p70 S6 kinase. The  
 648 black arrows indicate the appropriate bands corresponding to p70 S6K. Densitometry  
 649 was performed to measure the intensities of the bands and phosphorylated and total

650 protein intensities were separately normalized against the loading control. (B and C)  
651 Relative RNA abundance of 4EBP1 (B) and ULK1 (C) in SARS-CoV-2 infected Huh7  
652 cells, respectively. After the infections, total RNA was prepared from the cells and  
653 converted to cDNA after which the specific transcripts were quantified by qPCR. (D)  
654 Immunoblot analysis of ribosomal proteins S3, L13a, and L26, over the course of  
655 infection in Huh7 cells. Densitometric values of each band was normalized against the  
656 loading control and the corresponding values are given above the panels.

657

658

659 **Figure 6**

660

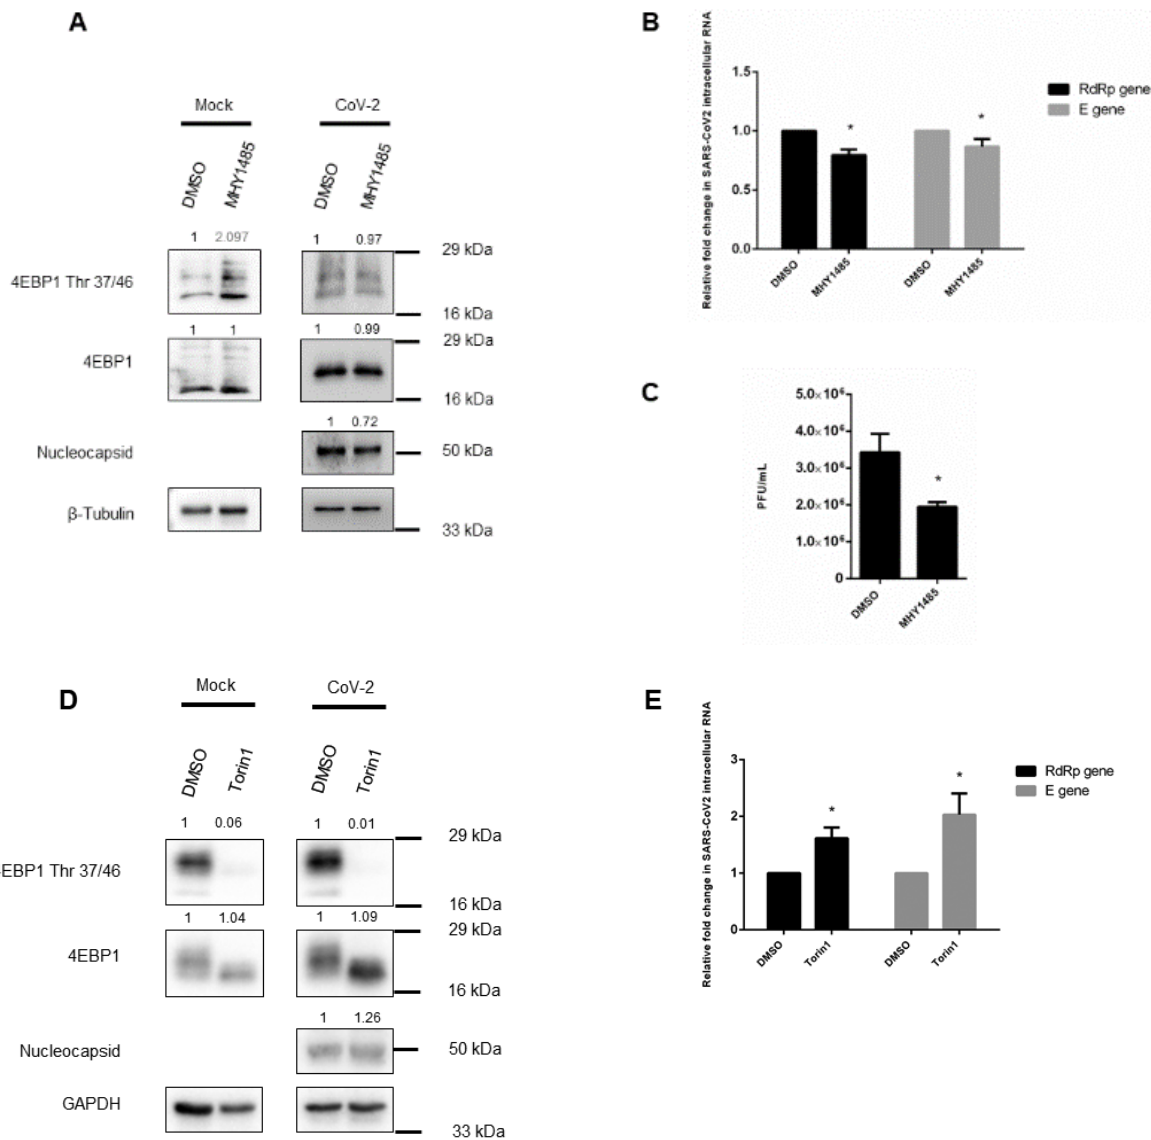

661

662

663 **Figure 6. mTORC1 restricts SARS CoV-2 replication.** (A) Mock and SARS-CoV-2  
 664 infected Huh7 cells were treated with either DMSO or 10 μM MHY1485 at 24 hpi and  
 665 harvested at 48 hpi, and successful activation was assessed by increased  
 666 phosphorylation of 4EBP1 in mock cells treated with MHY1485. Viral protein translation  
 667 under the conditions of infection was measured through Nucleocapsid levels. (B)  
 668 Relative fold change in SARS-CoV-2 intracellular RNA in infected cells treated with  
 669 DMSO or 10 μM MHY1485. Viral genes E and RdRp were measured from the RNA  
 670 samples isolated from the infected or the mock control cells and the relative fold change  
 671 was represented graphically. (C) Relative measure of infectivity of the supernatant  
 672 represented as PFU/mL from SARS-CoV-2 infected Huh7 cells treated with DMSO or

673 10  $\mu$ M MHY1485. (D) Mock and SARS-CoV-2 infected Huh7 cells were infected with  
674 SARS-CoV-2 for two hours, treated with either DMSO or 750 nM Torin1 upto 24 hpi and  
675 harvested. Similar set up in mock cells was used. Inhibition was assessed by drop in  
676 4EBP1 phosphorylation in Torin1 treated mock cells. Viral translation was indicated by  
677 Nucleocapsid. (E) Relative abundance of intracellular viral RNA (RdRp and E) from  
678 CoV-2 infected Huh7 cells treated with either DMSO or 750 nM Torin1. Graphs are  
679 plotted as mean  $\pm$  SEM and *p*-values are represented as \* indicating *p*-values  $\leq$  0.05.

680

681

682

683

684

685

686

687

688

689

690

691

692

693

694

695

696

697

698

699

700

701

702

703 **Supplementary figure S1**

704

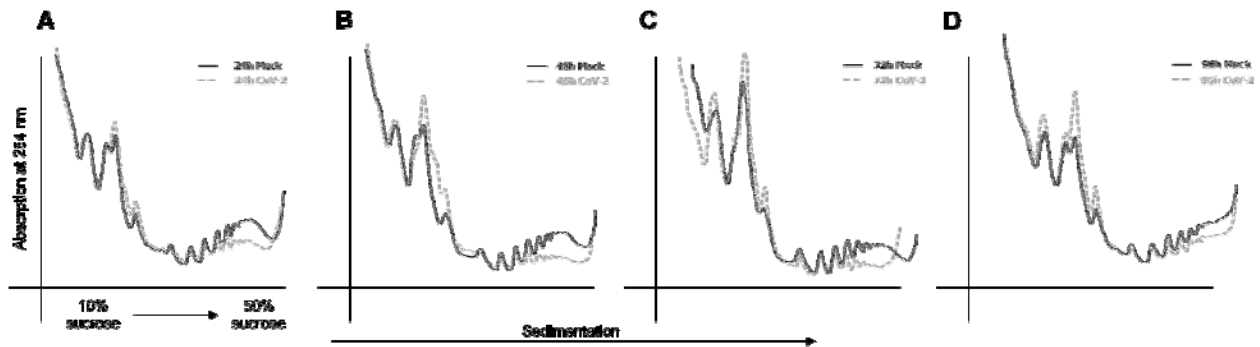

705

706

707

708 **Figure S1:** (A-D) Polysome profiles of Caco2 cells infected with another strain of SARS-  
709 CoV-2 (hCoV-19/India/TG-CCMB-L1021/2020) and processed as mentioned previously  
710 in Figure 1. Infected cells were collected at 24-, 48-, 72-, and 96 hpi and were analyzed.  
711 Panels A-D represent polysome profiles from these times points in the order of increase  
712 time intervals.

713

714

715

716

717

718

719

720

721

722

723

724

725

726

727 **Supplementary figure S2**

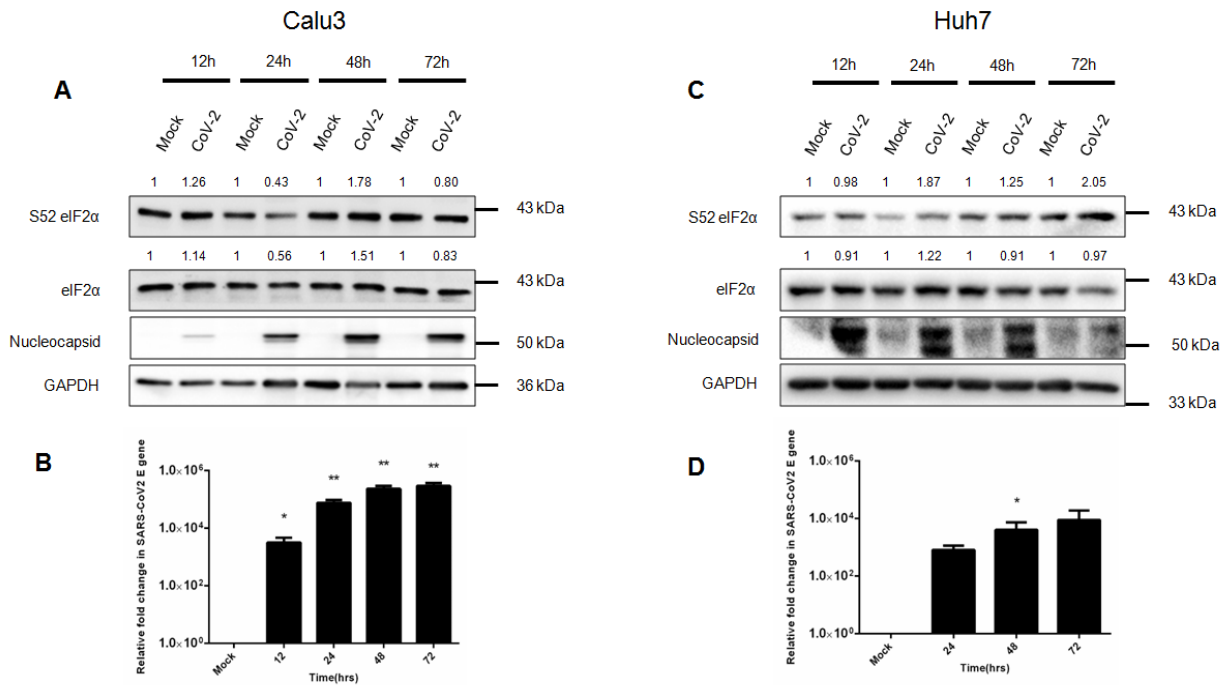

728

729

730 **Figure S2: SARS-CoV-2 infection does not cause eIF2α phosphorylation during**  
 731 **the suppression of translation activities:** (A, C) Representative immunoblots  
 732 showing phosphorylation and expression of eIF2α in Calu3 (A), and Huh7 (C) cells,  
 733 respectively, over 12, 24, 48 and 72 hours. Each panel has densitometric values of fold  
 734 change in phosphorylation of eIF2α and expression, individually normalized to GAPDH,  
 735 of the panel displayed. (B, D) qRT-PCR data depicting relative fold change in SARS-  
 736 CoV-2 E gene, along SARS-CoV-2 infection in Calu3 (B), and Huh7 (C) cells. Graphs  
 737 represent data from 3 sets and are plotted as mean ± SEM. *p*-values are represented  
 738 as \* and \*\*, indicating *p*-values ≤ 0.05 and 0.005, respectively.

739

740

741

742

743

744

745

746



747 **Supplementary figure S3**

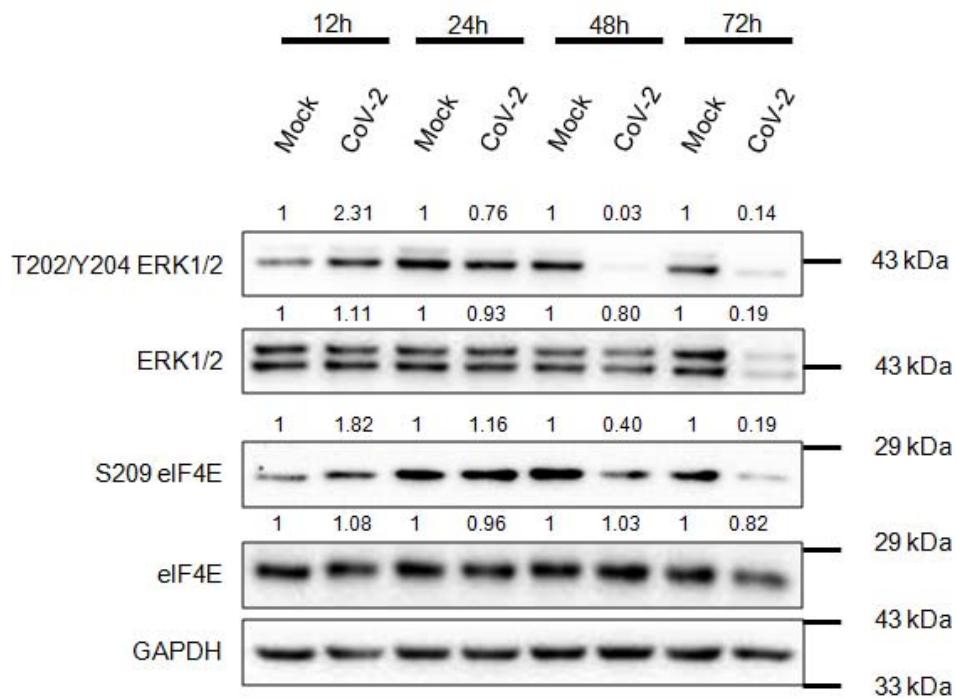

748

749

750 **Figure S3: ERK1/2-Mnk1/2-eIF4E axis is inhibited during SARS-CoV-2 infection.**

751 Representative immunoblot of phosphorylation levels of ERK1/2, Mnk1 and eIF4E in  
752 Huh7 cells, with densitometric analysis depicting fold change in phosphorylation of  
753 ERK1/2 and eIF4E, and fold change in their expression.

754

755

756

757

758

759

760

761

762

763

764 **Supplementary figure S4**

765

766

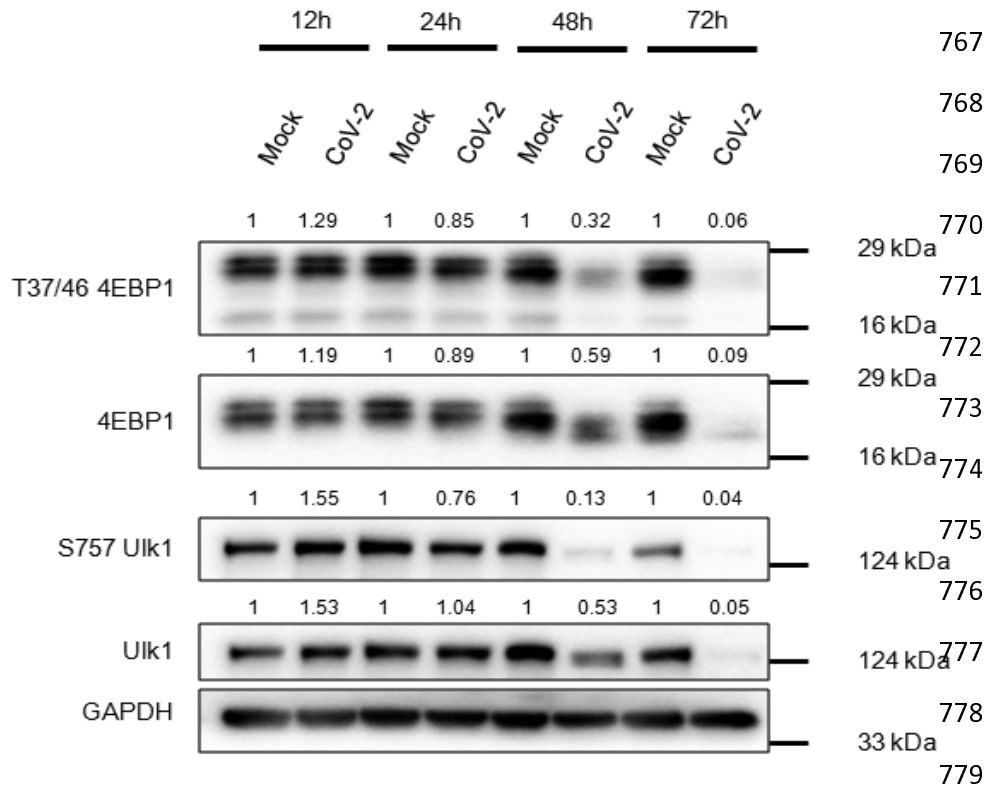

780

781

782

783 **Figure S4: SARS-CoV-2 inhibits mTORC1 and depletes its key substrates. (A)**  
784 Immunoblots of mTOR substrates, 4EBP1 and ULK1, from mock and infected Huh7  
785 cells showing their phosphorylation as well as expression as indicated in the  
786 densitometric values above each blot.

787

788
